# Supplementary material for: Facile one-pot synthesis of Fe3O4@chitosan nanospheres for MRI and fluorescence imaging guided chemo-photothermal combinational cancer therapy
Source: Royal Society of Chemistry journal article supplement (doi:10.1039/c6dt03897b), 2016-01-01
Supplement: c6dt03897b1.pdf [file c6dt03897b1.pdf]

## Electronic Supplementary Information

### Facile and One-pot Synthesis of Fe<sub>3</sub>O<sub>4</sub>@chitosan Nanospheres for MRI and Fluorescence Imaging Guided Chemo-photothermal Combinational Therapy of Cancer

Zhifang Gao, ‡<sup>a</sup> Xijian Liu, \*‡<sup>a</sup> Yeying Wang,<sup>a</sup> Guoying Deng,<sup>b</sup> Feng Zhou,<sup>b,c</sup> Qian Wang,<sup>b</sup> Lijuan Zhang<sup>a</sup> and Jie Lu<sup>\*a</sup>

<sup>a</sup>School of Chemistry and Chemical Engineering, Shanghai University of Engineering Science, Shanghai 201620, P. R. China. E-mail: liuxijian@sues.edu.cn; E-mail: dr.lujie@foxmail.com

<sup>b</sup>Orthopedic Traumatology, Trauma Center, Shanghai First People's Hospital, Shanghai Jiao Tong University School of Medicine, 100 Haining Road, Shanghai 200080, P. R. China

<sup>c</sup>First School of Clinical Medicine, Nanjing Medical University, Nanjing, 211166, P. R. China

#### Supplementary Figures

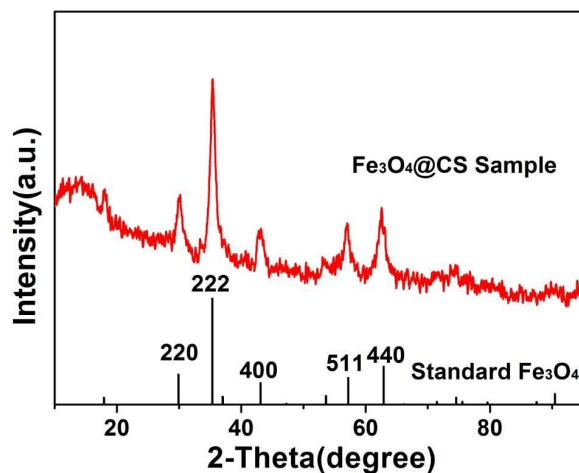

Fig.S1 XRD pattern of Fe<sub>3</sub>O<sub>4</sub>@CS nanospheres.

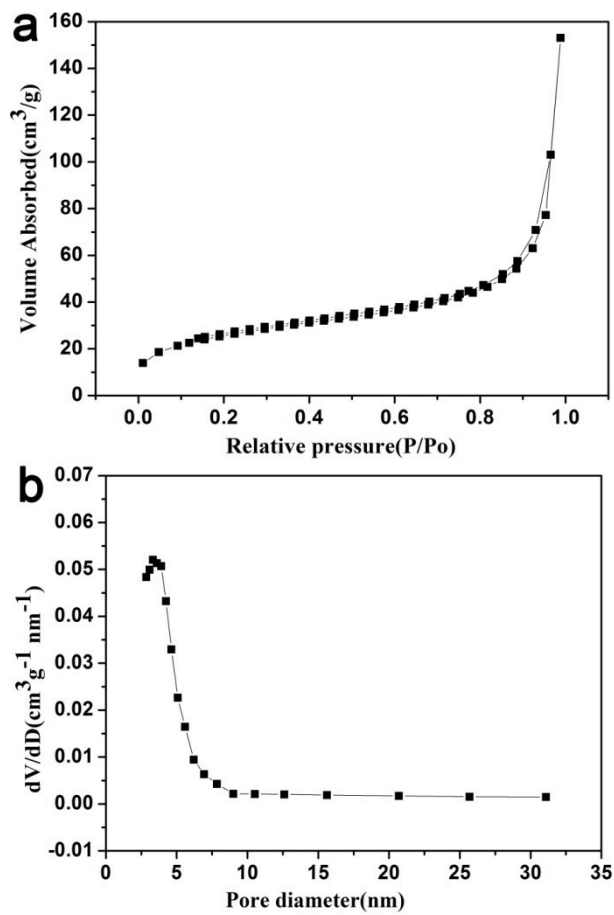

**Fig.S2** (a) N<sub>2</sub> adsorption-desorption isotherms and (b) pore size diameter distribution of Fe<sub>3</sub>O<sub>4</sub>@CS nanospheres.

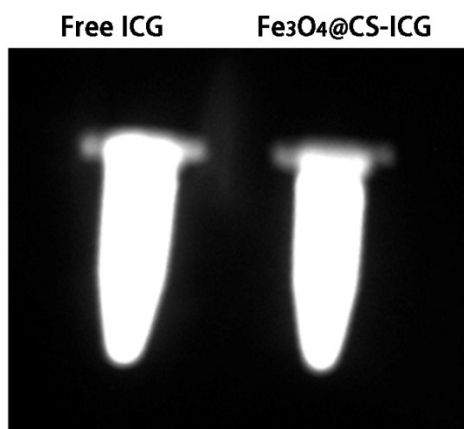

**Fig.S3** NIR fluorescence images of free ICG and Fe<sub>3</sub>O<sub>4</sub>@CS-ICG nanocomposites solution.

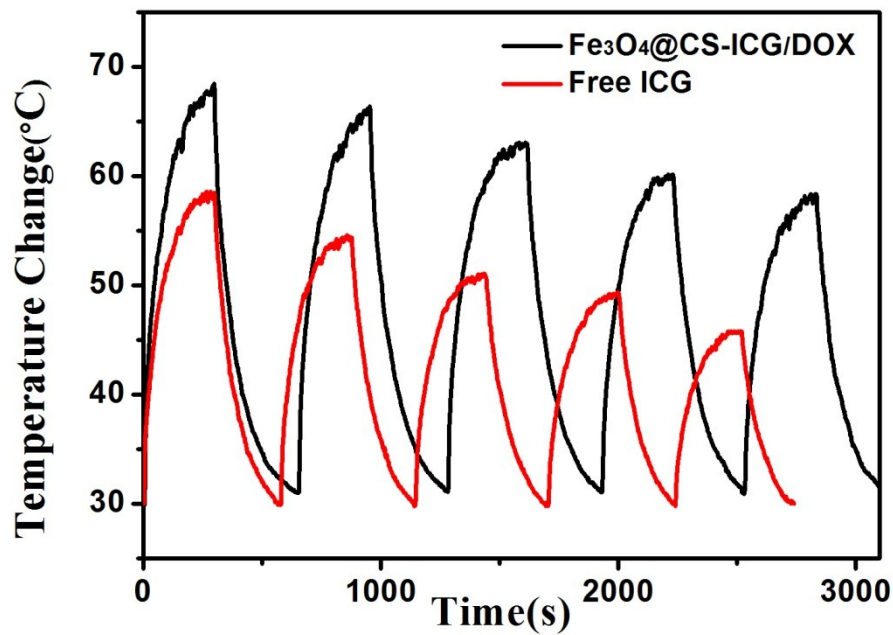

**Fig.S4** The temperature changes of Fe<sub>3</sub>O<sub>4</sub>@CS-ICG/DOX nanocomposites and free ICG solution over five ON/OFF cycles of 808 nm laser irradiation.

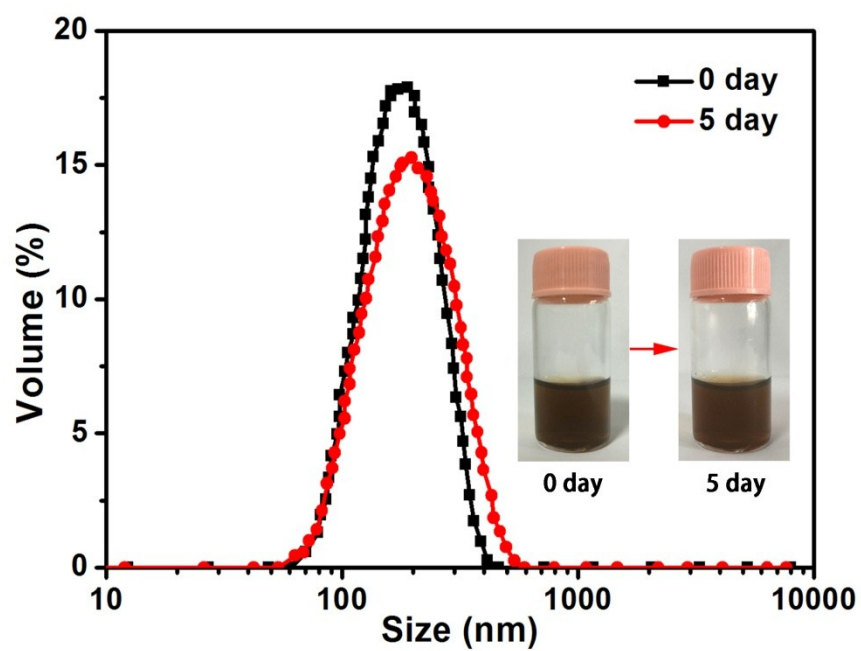

**Fig.S5** Fe<sub>3</sub>O<sub>4</sub>@CS-ICG/DOX nanocomposites size distribution after placed for 0 and 5 days.

(Inset: Photographs of Fe<sub>3</sub>O<sub>4</sub>@CS-ICG/DOX nanocomposites solution).

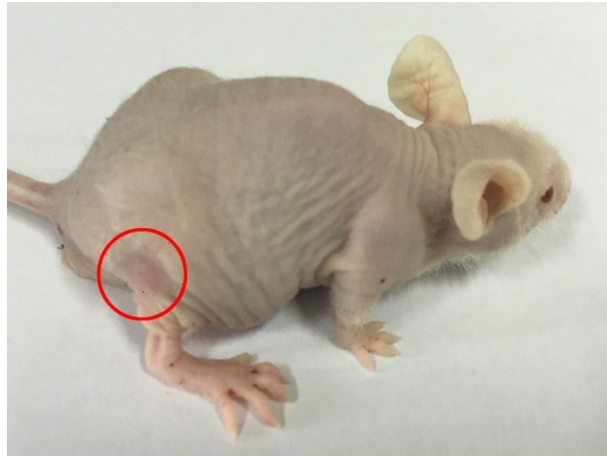

**Fig.S6** Photo of  $\text{Fe}_3\text{O}_4@CS\text{-ICG/DOX+NIR}$  group mice after 30 d treatments, the tumor location was marked with red circle.
